# Supplementary figures and images for: Crucial role of p53-dependent cellular senescence in suppression of Pten-deficient tumorigenesis
Source: Springer Nature journal article supplement (doi:10.1038/nature03918), 2005-08-01

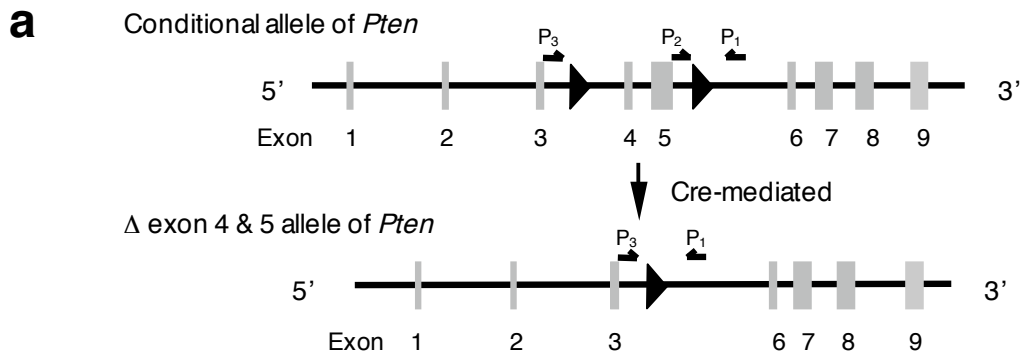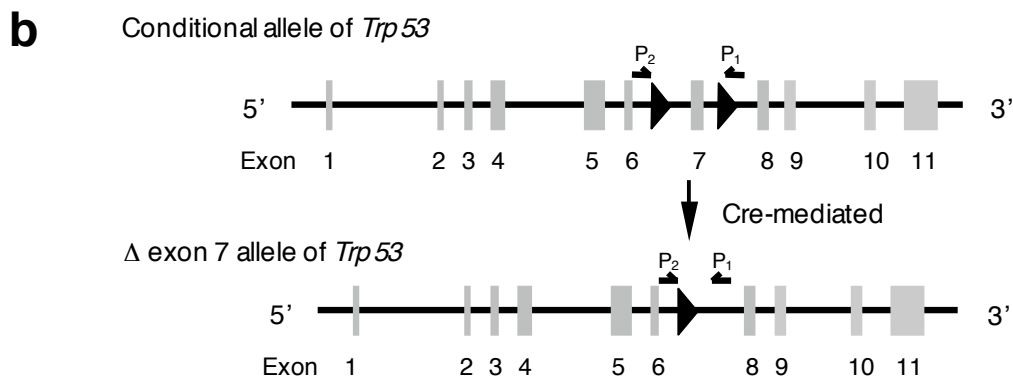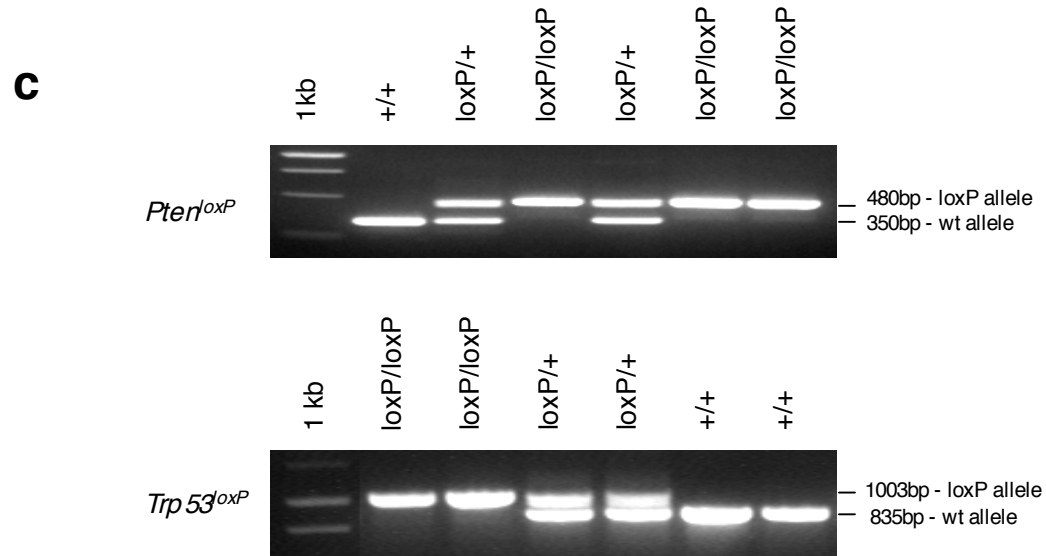

Supplement: 41586_2005_BFnature03918_MOESM3_ESM.pdf [file 41586_2005_BFnature03918_MOESM3_ESM.pdf]

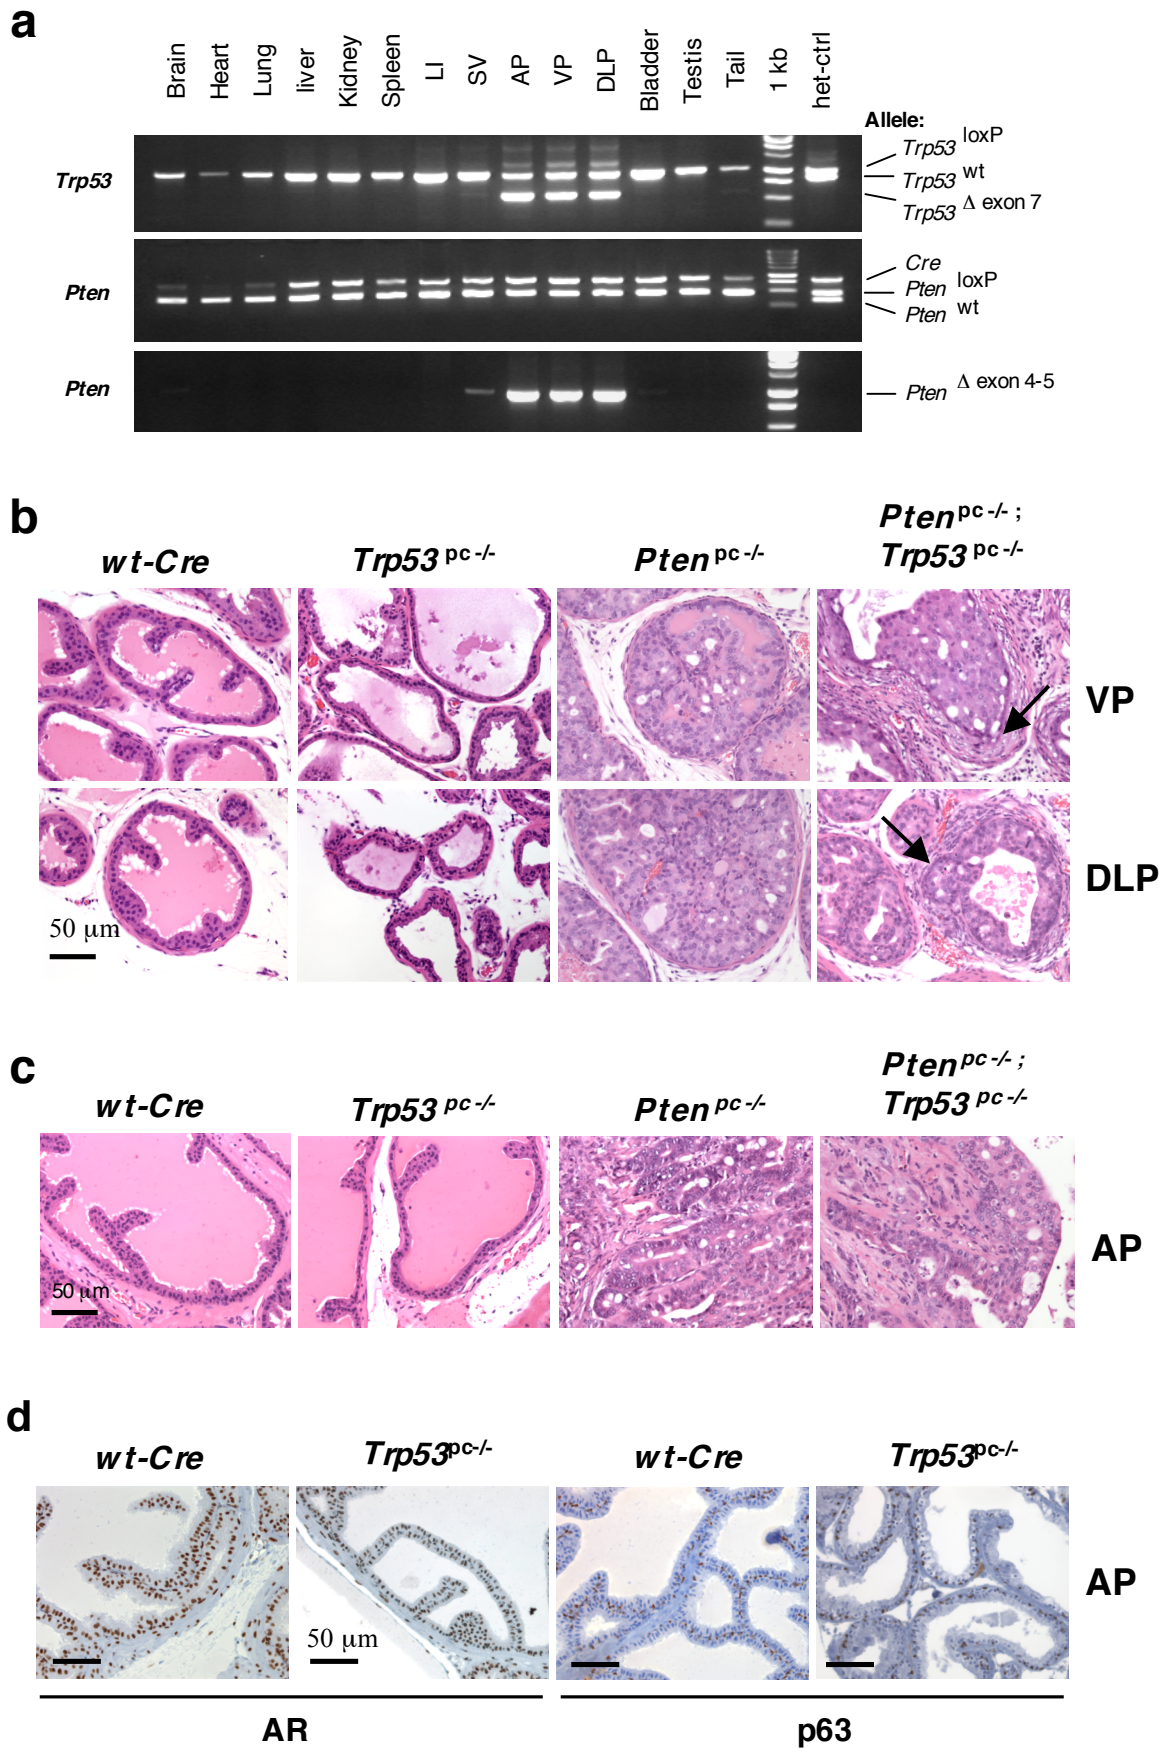

Supplement: 41586_2005_BFnature03918_MOESM4_ESM.pdf [file 41586_2005_BFnature03918_MOESM4_ESM.pdf]

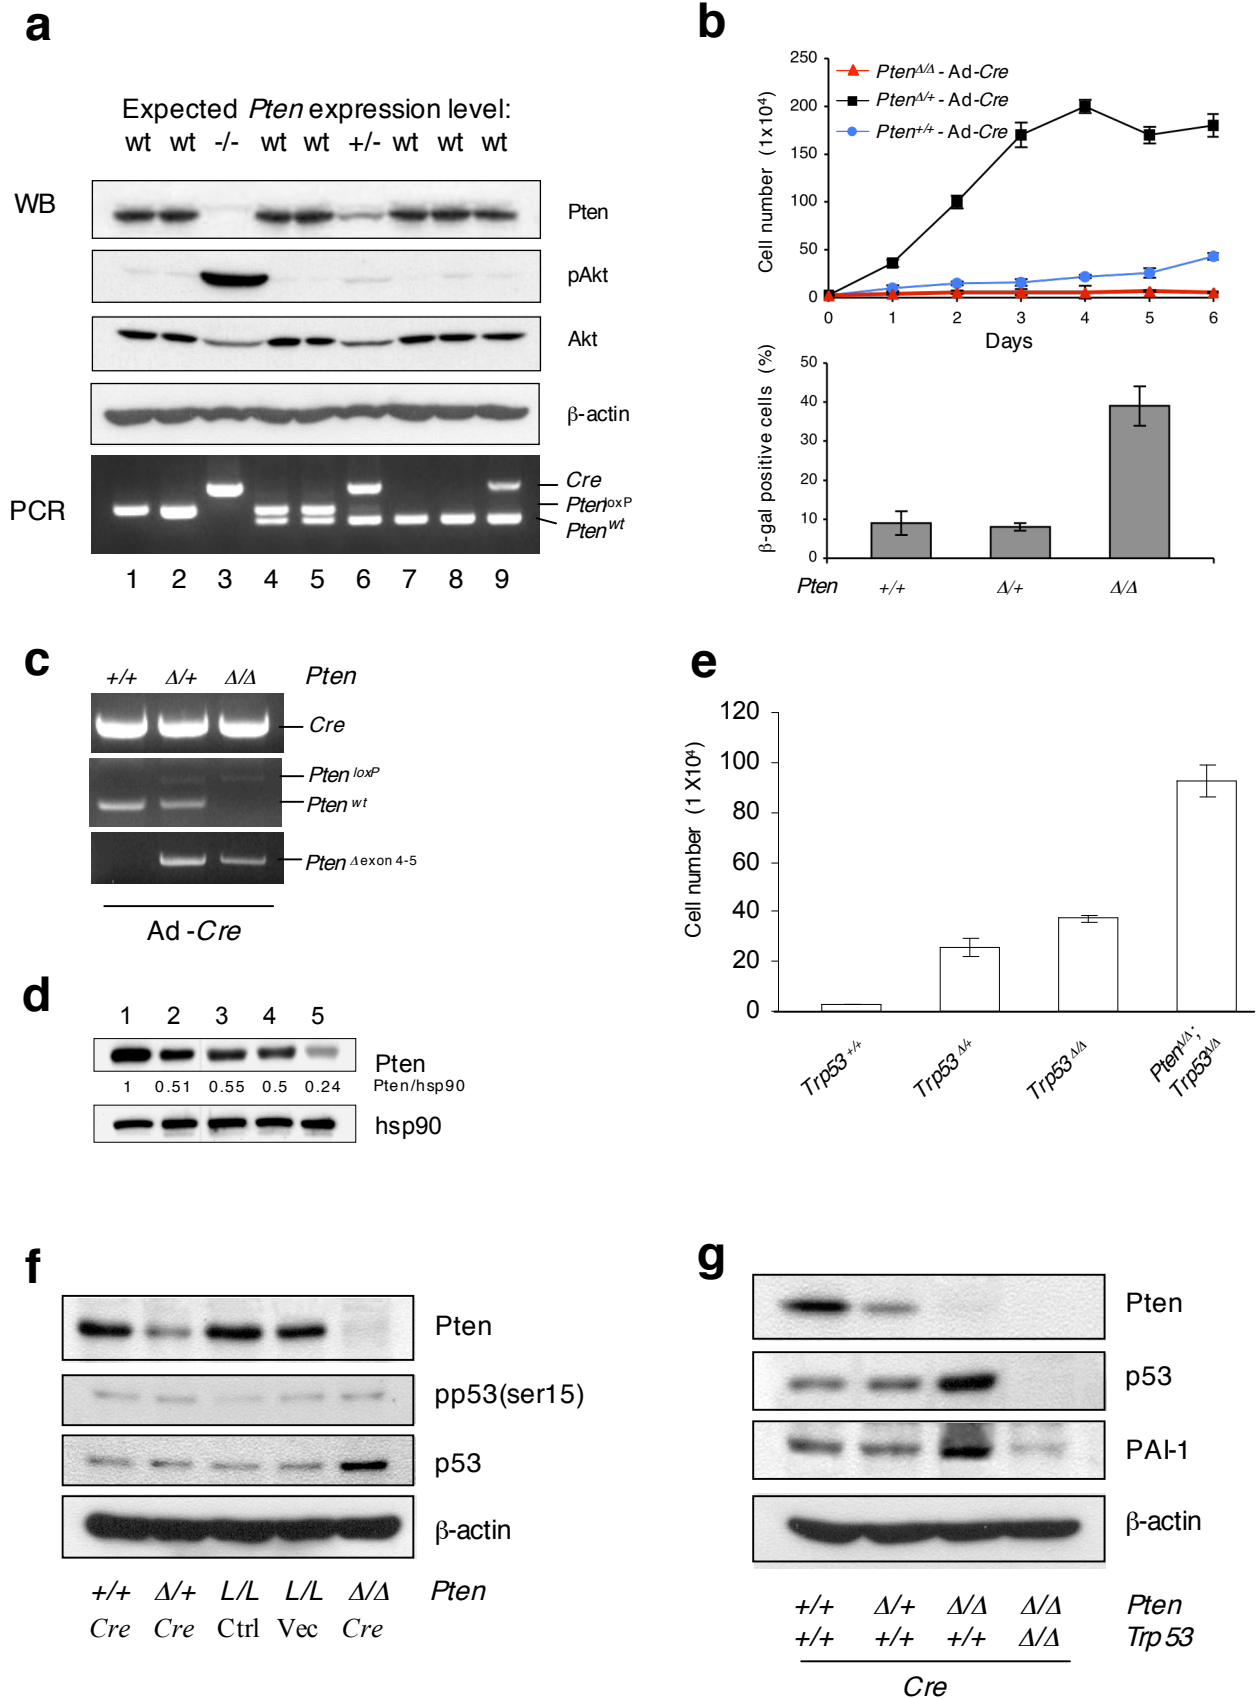

Supplement: 41586_2005_BFnature03918_MOESM5_ESM.pdf [file 41586_2005_BFnature03918_MOESM5_ESM.pdf]

**a**

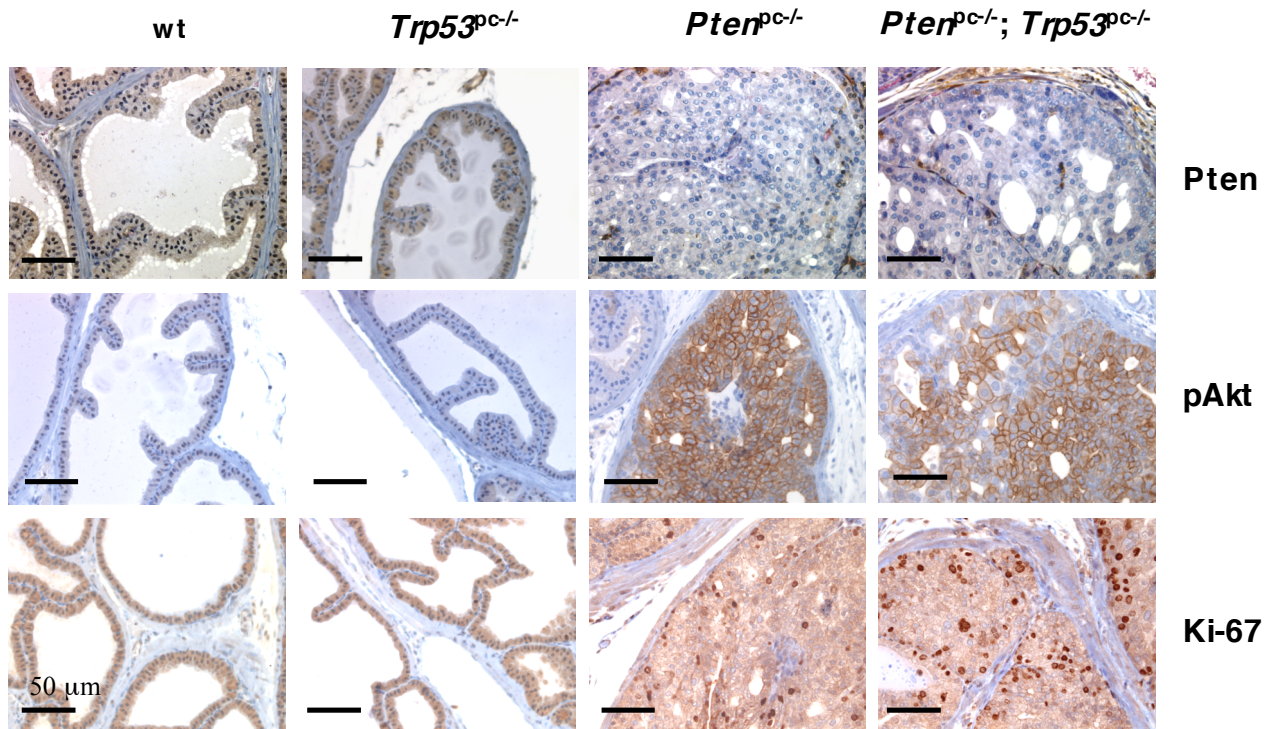

**b**

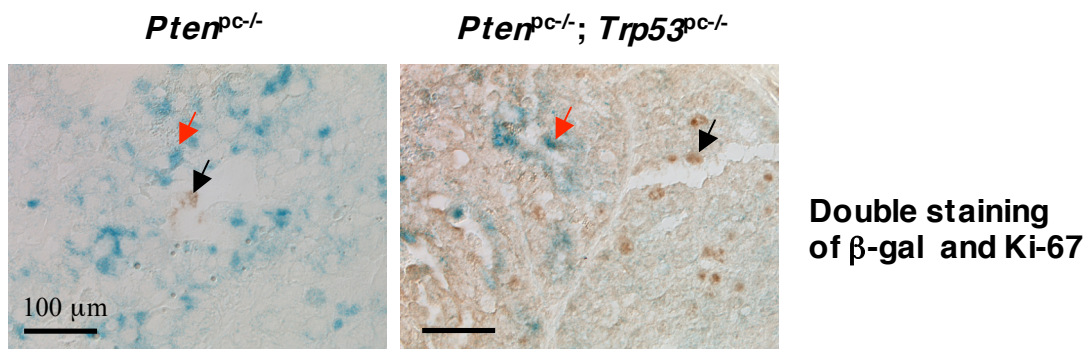

Supplement: 41586_2005_BFnature03918_MOESM6_ESM.pdf [file 41586_2005_BFnature03918_MOESM6_ESM.pdf]

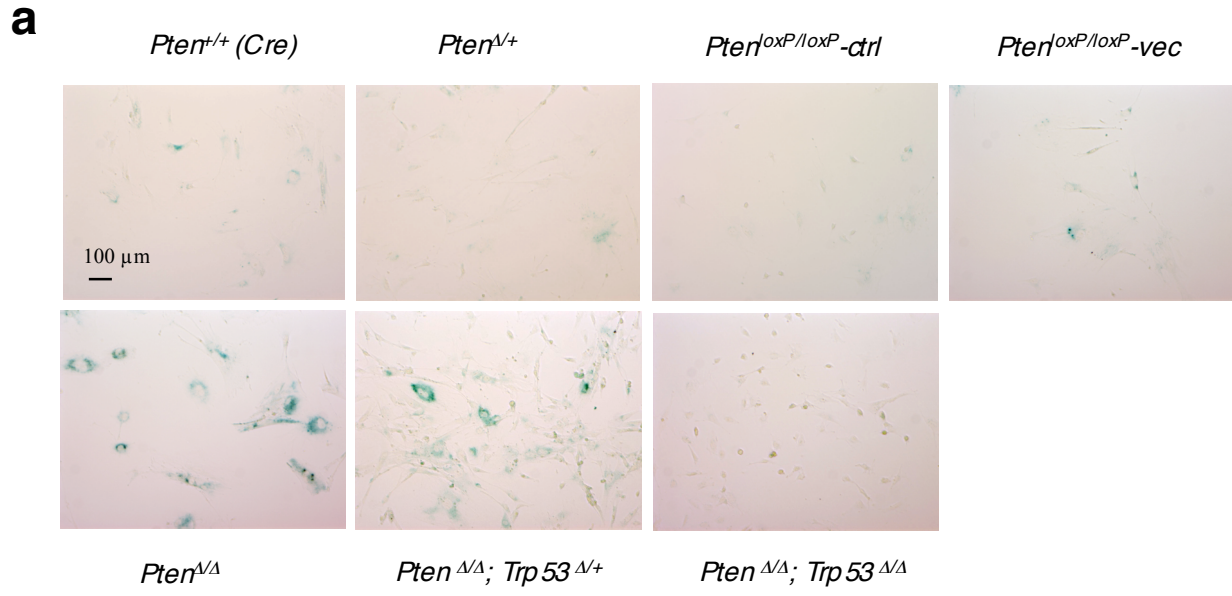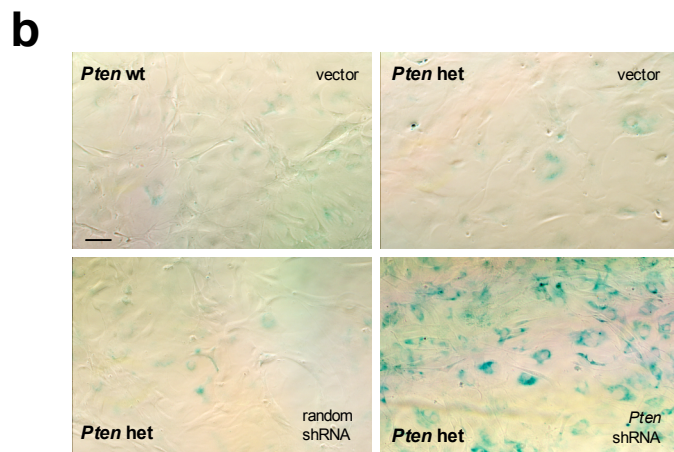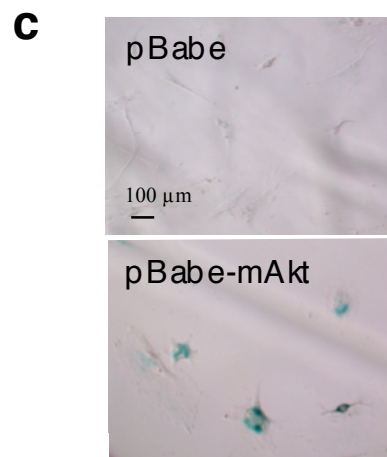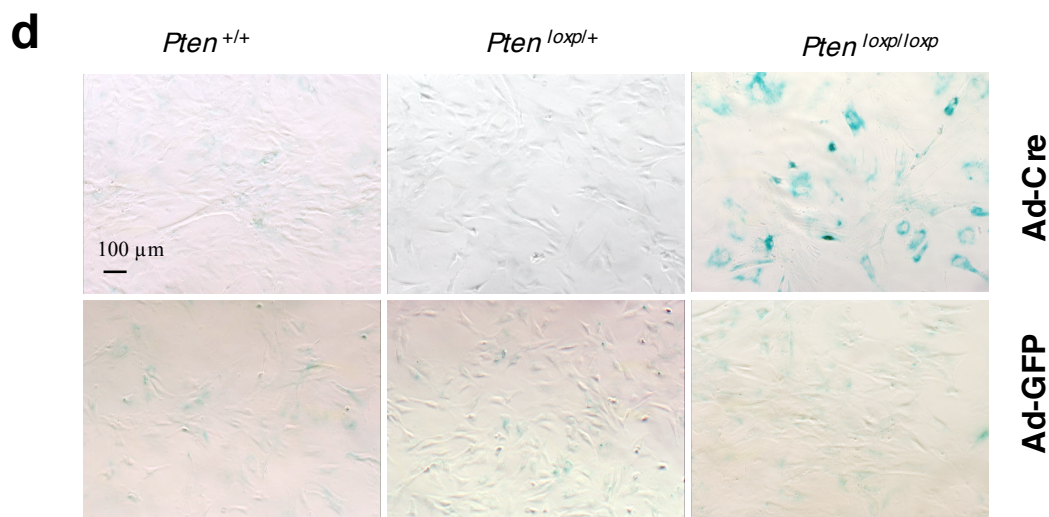

Supplement: 41586_2005_BFnature03918_MOESM7_ESM.pdf [file 41586_2005_BFnature03918_MOESM7_ESM.pdf]

**a**

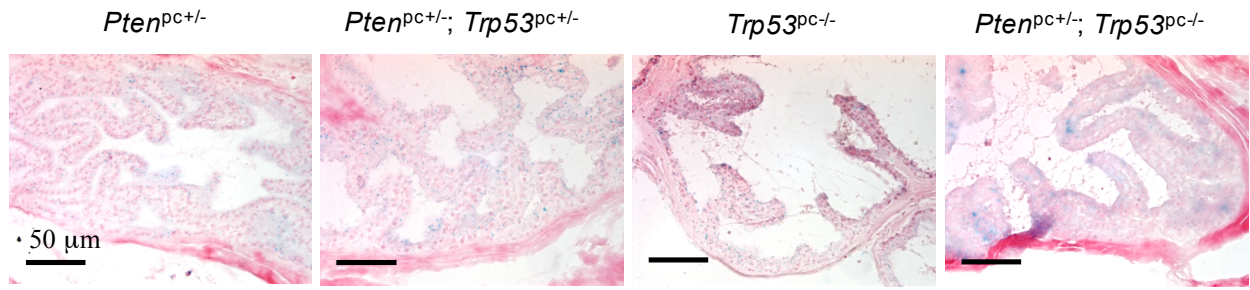

**b**

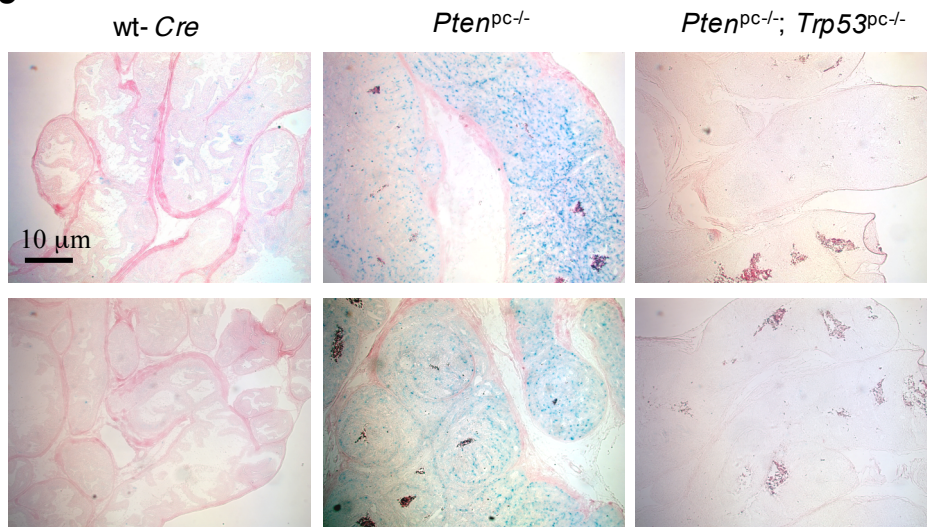

Supplement: 41586_2005_BFnature03918_MOESM8_ESM.pdf [file 41586_2005_BFnature03918_MOESM8_ESM.pdf]
